# Supplementary material for: Activation-inducible CAR expression enables precise control over engineered CAR T cell function
Source: PubMed Central journal article supplement (PMC10241805; doi:10.1038/s42003-023-04978-w), 2023-06-05
Supplement: 42003_2023_4978_MOESM3_ESM.pdf [file 42003_2023_4978_MOESM3_ESM.pdf]

## Description of Additional Supplementary Files

**File name:** Supplementary Data 1

**Description:** The source data behind the graphs in the paper
